# Supplementary material
Source: bioRxiv or medRxiv preprint supplement (http://medrxiv.stage.highwire.org/content/medrxiv/early/2024/02/29/2024.02.28.24303519/DC1/embed/media-1.pdf)
Supplement: Supplementary file [file media-1.pdf]

## **Supplementary Materials**

### **Cognitive Battery**

Scores from the Word List Memory, Word List Recall, Word List Recognition, and the immediate and delayed recall scores for Story A in Logical Memory and the East Boston Story were utilized to assess episodic memory. Semantic memory was examined through performance on Verbal Fluency, a 15-item reading test, and a version of the Boston Naming Test. The domain of working memory was assessed through results from Digit Ordering, along with Digit Span Forwards and Backwards. Visuospatial ability were evaluated through scores on a 16-item version of the Progressive Matrices and a 15-item version of Judgement and Line Orientation. Perceptual speed was measured through performance on Number Comparison, two indices from a modified version of the Stroop Neuropsychological Screening Test, and the Symbol Digit Modalities Test. Z-scores were calculated for the raw scores of each individual test using the baseline mean (SD), and these z-scores for the tests within each domain were then averaged.

### **Structural MRI acquisition and processing of WMH**

A previously validated WMH segmentation technique that has been extensively tested for assessment of WMHs in aging and neurodegenerative diseases was used to obtain WMH measurements.<sup>1</sup> This technique has been previously employed in other multi-center studies<sup>2,3</sup> and has also been validated in the ADNI cohort.<sup>4</sup> The automated WMH segmentation technique extracts a set of location (i.e. spatial priors) and intensity (distribution histograms) features and uses them in combination with a random forest classifier to detect the WMHs in new images.<sup>1,2,3</sup> The method has been trained based on a library of manually segmented scans from the ADNI data (50 participants independent of the ones studied here), ensuring its accuracy when applied to the current dataset. Automatic segmentation of the WMHs was completed using only the T1w

contrasts. The decision to use only T1w images for WMH segmentation was made since ADNI1 study only includes T1w, and T2w/PD images, whereas ADNI2/GO includes T1w and axial 2D FLAIR images, and ADNI3 includes T1w sagittal 3D FLAIRs. Since the resolution of the images (i.e., voxel sizes) were very different between T2w/PD ( $1 \times 1 \times 3 \text{ mm}^3$ ) and FLAIRs ( $0.85 \times 0.85 \times 5 \text{ mm}^3$  and  $1 \times 1 \times 1.2 \text{ mm}^3$ ), to be able to reliably combine and use WMH volumes from all these studies, we only used the T1w images for WMH segmentation. We have previously validated the performance of our pipeline in detecting WMHs based on T1w images both in ADNI and another independent dataset, and have shown that the T1w-based WMH volumes (1) hold strong correlations with T2w/PD and FLAIR based WMH volumes ( $r = .89$ ,  $p < .001$  for ADNI1, and  $r = .97$ ,  $p < .001$  for ADNI2/GO), and (2) have similar relationships with clinical/cognitive scores and risk factors associated with WMHs.<sup>34</sup> Finally, the quality of all WMH segmentations was visually assessed by M.D. (blinded to clinical diagnosis), and those that did not pass this quality control step were discarded from the analyses ( $N=59$ ). WMH load was defined as the volume of all voxels identified as WMH in the standard space (in  $\text{mm}^3$ ) and were normalized for head size. Regional and total WMH volumes were calculated based on Hammers Atlas.<sup>1,5</sup> All WMH volumes were also log-transformed to achieve normal distribution.

## **Rush Neuropathological outcomes**

**Tangles:** This outcome refers to the counts of neurofibrillary tangles across various regions of the brain. Tangles are aggregates of the tau protein that are a hallmark of Alzheimer's pathology. The counts may be missing for certain regions due to damage; however, a summary measure of neurofibrillary tangle burden is computed if data are available for at least two out of five regions.

**Plaq\_n (Neuritic Plaques):** Neuritic plaques are deposits of amyloid protein in the brain that are often surrounded by degenerating nerve terminals. The `plaq_n` metric specifically measures the burden of these plaques in various brain regions, which contributes to the overall assessment of Alzheimer's pathology.

**Plaq\_d (Diffuse Plaques):** Diffuse plaques are also accumulations of amyloid protein but lack the dense core and neuronal damage typical of neuritic plaques. The `plaq_d` metric assesses the burden of these plaques across different brain regions.

**Niareagansc (NIA-Reagan Diagnosis):** The score from this outcome classifies the likelihood of Alzheimer's disease based on pathological criteria established by the National Institute on Aging (NIA) and the Reagan Institute. It uses a combination of neurofibrillary tangles and neuritic plaque assessments to assign one of four likelihood levels for Alzheimer's disease diagnosis.

**Nft (Neurofibrillary Tangles):** This variable represents the summary measure for neurofibrillary tangle burden based on microscopic examination of brain tissue. Tangles contribute to neuronal death and are a key feature in diagnosing Alzheimer's disease.

**Gpath (Global AD Pathology):** The global AD pathology score is an average of three summary measures (`plaq_d`, `plaq_n`, and `nft`) and represents a composite measure of Alzheimer's disease pathology, accounting for neuropathological changes.

**Cvda\_4gp2 (Cerebral Atherosclerosis Rating):** This rating assesses the presence and severity of atherosclerosis in the major arteries of the brain. It is graded based on the visual examination of the Circle of Willis and its proximal branches after paraformaldehyde fixation.

**Ceradsc (CERAD Score):** The CERAD score is a standardized measure used to quantify the density of neuritic plaques and contributes to the neuropathological diagnosis of Alzheimer's disease. It ranges from no Alzheimer's disease to definite Alzheimer's disease based on plaque density.

**Braaksc (Braak Stage):** The Braak stage is a semiquantitative assessment of neurofibrillary tangle distribution and density in the brain. The stages range from I to VI, with higher stages indicating more extensive and severe neurofibrillary pathology.

**Arteriol\_scler (Arteriolosclerosis):** Arteriolosclerosis refers to the thickening and hardening of the walls of arterioles. Histological changes commonly found in the small vessels of the brain in aging were examined. Histological changes include intimal deterioration, smooth muscle

degeneration, and fibrohyalinotic thickening of arterioles with consequent narrowing of the vascular lumen. The vessels of the anterior basal ganglia were calculated.

Ad\_reagan (AD Presence Based on NIA-Reagan Criteria): This dichotomous variable is derived from the NIA-Reagan criteria and indicates the presence or absence of Alzheimer's disease pathology. A score of 1 indicates Alzheimer's disease is present (high or intermediate likelihood), and a score of 0 indicates it is not present (low likelihood or no AD).

ci\_num2\_mct (Microinfarcts): This outcome included the presence of one or more chronic microinfarcts. It is a binary variable indicating the presence (or absence) of chronic microscopic infarctions in any location within the brain, as determined by neuropathological evaluations.

ci\_num2\_gct (Gross Cerebral Infarctions): This variable represents the presence of one or more gross chronic infarcts, which are large, observable cerebral infarctions. This is a binary variable determined by neuropathological evaluations.

Table 7: Informative Predictors of continuous neuropathology outcomes

|                    |                                                                                                             |             |             |
|--------------------|-------------------------------------------------------------------------------------------------------------|-------------|-------------|
| <i>Plaq_n</i>      |                                                                                                             |             |             |
| <b>Model</b>       | <b>Predictors</b>                                                                                           | <b>RMSE</b> | <b>CORR</b> |
| Bagging            | WM, Amygdala, Thalamus, Perceptual Speed, Episodic Memory, Age at Visit                                     | 0.59        | 0.61        |
| Gradient Boosting  | Amygdala, Global Cognition, Episodic Memory, Perceptual Orientation, APOE Genotype, Age at Visit            | 0.60        | 0.64        |
| Linear Regression  | GM, Hippocampus, Global Cognition, Memory Trouble, Perceptual Orientation, APOE Genotype                    | 0.61        | 0.60        |
| SVM                | GM, Amygdala, Putamen, Perceptual Speed, Memory Trouble, Episodic Memory, APOE Genotype                     | 0.57        | 0.63        |
|                    |                                                                                                             |             |             |
| <i>Plaq_d</i>      |                                                                                                             |             |             |
| <b>Model</b>       | <b>Predictors</b>                                                                                           | <b>RMSE</b> | <b>CORR</b> |
| Bagging            | WMH, Entorhinal, Parahippocampal, Global Cognition, Perceptual Speed, Perceptual Orientation, APOE Genotype | 0.54        | 0.58        |
| Gradient Boosting  | WMN Ventricles, Thalamus, Entorhinal, Parahippocampal, Perceptual Speed, APOE Genotype                      | 0.56        | 0.58        |
| Linear Regression  | GM, WM, WMH, Hippocampus, Ventricles, Perceptual Speed, APOE Genotype                                       | 0.57        | 0.56        |
| SVM                | GM, WM, Amygdala, Working Memory, APOE Genotype, Sex, Age at Visit                                          | 0.56        | 0.53        |
|                    |                                                                                                             |             |             |
| <i>niareagansc</i> |                                                                                                             |             |             |
| <b>Model</b>       | <b>Predictors</b>                                                                                           | <b>RMSE</b> | <b>CORR</b> |
| Bagging            | GM, Entorhinal, Global Cognition, Perceptual Speed, Episodic Memory, Perceptual Orientation, APOE Genotype  | 0.57        | 0.66        |

|                   |                                                                                                          |             |             |
|-------------------|----------------------------------------------------------------------------------------------------------|-------------|-------------|
| Gradient Boosting | GM, Amygdala, Perceptual Speed, Episodic Memory, APOE Genotype, Age at Visit                             | 0.56        | 0.67        |
| Linear Regression | GM, WMH, Amygdala, Perceptual Speed, Memory Trouble, APOE Genotype, Sex                                  | 0.59        | 0.65        |
| SVM               | Amygdala, Thalamus, Perceptual Speed, Memory Trouble, APOE Genotype, Sex                                 | 0.57        | 0.66        |
|                   |                                                                                                          |             |             |
|                   |                                                                                                          |             |             |
| <i>gpath</i>      |                                                                                                          |             |             |
| <b>Model</b>      | <b>Predictors</b>                                                                                        | <b>RMSE</b> | <b>CORR</b> |
| Bagging           | Hippocampus, Amygdala, Putamen, Parahippocampal, Global Cognition, Perceptual Orientation, APOE Genotype | 0.44        | 0.70        |
| Gradient Boosting | Amygdala, Entorhinal, Parahippocampal, Global Cognition, Memory Trouble, APOE Genotype, Sex              | 0.47        | 0.69        |
| Linear Regression | GM, Amygdala, Caudate, Entorhinal, Episodic Memory, APOE Genotype, Sex                                   | 0.47        | 0.68        |
| SVM               | GM, WMH, Hippocampus, Entorhinal, Perceptual Speed, Episodic Memory, APOE Genotype                       | 0.46        | 0.69        |
|                   |                                                                                                          |             |             |
|                   |                                                                                                          |             |             |
| <i>cvda_4gp2</i>  |                                                                                                          |             |             |
| <b>Model</b>      | <b>Predictors</b>                                                                                        | <b>RMSE</b> | <b>CORR</b> |
| Bagging           | WM, Amygdala, Ventricles, Entorhinal, APOE Genotype, Sex, Age at Visit                                   | 0.65        | 0.50        |
| Gradient Boosting | WM, Ventricles, Caudate, Global Cognition, Memory Trouble, APOE Genotype, Age at Visit                   | 0.61        | 0.54        |
| Linear Regression | GM, Hippocampus, Putamen, Perceptual Orientation, APOE Genotype, Age at Visit                            | 0.64        | 0.54        |
| SVM               | WMN, Caudate, Memory Trouble, Episodic Memory, APOE Genotype, Sex, Age at Visit                          | 0.63        | 0.57        |
|                   |                                                                                                          |             |             |

|                       |                                                                                                              |             |             |
|-----------------------|--------------------------------------------------------------------------------------------------------------|-------------|-------------|
|                       |                                                                                                              |             |             |
| <i>ceradsc</i>        |                                                                                                              |             |             |
| <b>Model</b>          | <b>Predictors</b>                                                                                            | <b>RMSE</b> | <b>CORR</b> |
| Bagging               | GM, Amygdala, Entorhinal, Parahippocampal, Global Cognition, APOE Genotype                                   | 1.06        | 0.54        |
| Gradient Boosting     | GM, Amygdala, Ventricles, Caudate, Global Cognition, Memory Trouble, APOE Genotype                           | 0.98        | 0.53        |
| Linear Regression     | GM, Hippocampus, Amygdala, Perceptual Speed, Memory Trouble, APOE Genotype, Sex                              | 1.00        | 0.55        |
| SVM                   | Amygdala, Global Cognition, Working Memory, Perceptual Speed, Memory Trouble, Episodic Memory, APOE Genotype | 0.98        | 0.55        |
|                       |                                                                                                              |             |             |
|                       |                                                                                                              |             |             |
| <i>arteriol_scler</i> |                                                                                                              |             |             |
| <b>Model</b>          | <b>Predictors</b>                                                                                            | <b>RMSE</b> | <b>CORR</b> |
| Bagging               | WMH, Caudate, Thalamus, Entorhinal, APOE Genotype                                                            | 0.68        | 0.58        |
| Gradient Boosting     | WMH, Putamen, Caudate, Thalamus, Entorhinal, APOE Genotype, Age at Visit                                     | 0.72        | 0.62        |
| Linear Regression     | WMN, WMH, Working Memory, Episodic Memory, Perceptual Orientation, APOE Genotype, Sex                        | 0.77        | 0.55        |
| SVM                   | Ventricles, Caudate, Thalamus, Entorhinal, Global Cognition, APOE Genotype, Sex                              | 0.77        | 0.54        |

Table 8: Informative Predictors of binary neuropathology outcomes

| <i>output_ci_num2_mct</i> |                                                                                            |                 |                    |                    |
|---------------------------|--------------------------------------------------------------------------------------------|-----------------|--------------------|--------------------|
| <b>Model</b>              | <b>Predictors</b>                                                                          | <b>Accuracy</b> | <b>Sensitivity</b> | <b>Specificity</b> |
| Bagging                   | WMH, Parahippocampal, Perceptual Speed, Memory Trouble, APOE Genotype, Age at Visit        | 0.77            | 0.61               | 0.89               |
| Gradient Boosting         | WMH, Hippocampus, Thalamus, Parahippocampal, Perceptual Speed, APOE Genotype, Age at Visit | 0.77            | 0.63               | 0.87               |
| Linear Regression         | WM, WMH, Hippocampus, Amygdala, APOE Genotype, Sex, Age at Visit                           | 0.69            | 0.53               | 0.85               |
| SVM                       | Hippocampus, Thalamus, Perceptual Speed                                                    | 0.70            | 0.45               | 0.85               |
|                           |                                                                                            |                 |                    |                    |
|                           |                                                                                            |                 |                    |                    |
| <i>output_ci_num2_gct</i> |                                                                                            |                 |                    |                    |
| <b>Model</b>              | <b>Predictors</b>                                                                          | <b>Accuracy</b> | <b>Sensitivity</b> | <b>Specificity</b> |
| Bagging                   | WM, WMH, Ventricles, Caudate, Thalamus, Global Cognition, APOE Genotype                    | 0.75            | 0.37               | 0.95               |
| Gradient Boosting         | GM, WM, Caudate, Memory Trouble, Perceptual Orientation, APOE Genotype                     | 0.82            | 0.65               | 0.93               |
| Linear Regression         | Putamen, Perceptual Speed, Memory Trouble, Perceptual Orientation, APOE Genotype           | 0.74            | 0.38               | 0.93               |
| SVM                       | WMH, Putamen, Parahippocampal, Memory Trouble, APOE Genotype                               | 0.69            | 0.20               | 0.91               |



## References

1. Dadar M, Maranzano J, Misquitta K, et al. Performance comparison of 10 different classification techniques in segmenting white matter hyperintensities in aging. *Neuroimage*. 2017;157(April):233-249. doi:10.1016/j.neuroimage.2017.06.009
2. Anor CJ, Dadar M, Collins DL, Tartaglia MC. The Longitudinal Assessment of Neuropsychiatric Symptoms in Mild Cognitive Impairment and Alzheimer's Disease and Their Association With White Matter Hyperintensities in the National Alzheimer's Coordinating Center's Uniform Data Set. *Biol Psychiatry Cogn Neurosci Neuroimaging*. 2021;6(1):70-78. doi:10.1016/j.bpsc.2020.03.006
3. Dadar M, Camicioli R, Duchesne S, Collins DL. The temporal relationships between white matter hyperintensities, neurodegeneration, amyloid beta, and cognition. *Alzheimer's Dement Diagnosis, Assess Dis Monit*. 2020;12(1):1-11. doi:10.1002/dad2.12091
4. Dadar M, Maranzano J, Ducharme S, Collins DL. White matter in different regions evolves differently during progression to dementia. *Neurobiol Aging*. 2019;76:71-79. doi:10.1016/j.neurobiolaging.2018.12.004
5. Dadar M, Maranzano J, Ducharme S, Carmichael OT, Decarli C, Collins DL. Validation of T1w-based segmentations of white matter hyperintensity volumes in large-scale datasets of aging. *Hum Brain Mapp*. 2018;39(3):1093-1107. doi:10.1002/hbm.23894
